# Supplementary material for: The predictors of adaptive and maladaptive coping behavior during the COVID-19 pandemic: The Protection Motivation Theory and the Big Five personality traits
Source: PubMed Central journal article supplement (PMC8525766; doi:10.1371/journal.pone.0258606), 2021-10-19
Supplement: pone.0258606.s001.pdf [file pone.0258606.s001.pdf]

**S1 Table. The items of the Coping Behavior Scale.** (*Did you engage in any of the following activities during the previous two weeks?*)

| <b>Construct</b>           | <b>Statement</b>                                                                                   |
|----------------------------|----------------------------------------------------------------------------------------------------|
| <b>Preventive behavior</b> | Staying at home, limiting going out only to cases in which it is necessary.                        |
|                            | Keeping physical distance from other people in public places.                                      |
|                            | Switching from public transport to driving, cycling, etc.                                          |
|                            | Not socializing with friends/family.                                                               |
|                            | Shopping during less busy hours to avoid crowded places.                                           |
|                            | Avoiding physical contact with older people.                                                       |
|                            | Disinfecting items (surfaces, door handles, phones).                                               |
|                            | Wearing face masks.                                                                                |
|                            | Frequently washing and/or disinfecting hands.                                                      |
|                            | Paying by card to minimize contact with germs and viruses.                                         |
| <b>Avoidant behavior</b>   | Avoiding thinking about the threat posed by the pandemic.                                          |
|                            | Avoiding conversations about the pandemic.                                                         |
|                            | Avoiding programs and media coverage about the pandemic.                                           |
| <b>Wishful thinking</b>    | Explaining to yourself that the risk of contracting the coronavirus is very low in Poland.         |
|                            | Explaining to yourself that perhaps the pandemic will die out on its own in the summer.            |
|                            | Explaining to yourself that the coronavirus causes a disease not much more dangerous than the flu. |
